# Supplementary material for: Metabolomic profiling identifies plasma sphingosine 1-phosphate levels associated with welding exposures
Source: HighWire-hosted journal article supplement (doi:10.1136/oemed-2020-106918), 2020-10-26
Supplement: oemed-2020-106918supp001_data_supplement.pdf [file oemed-2020-106918supp001_data_supplement.pdf]

**Supplementary Table 1.** Seasonal PM2.5 levels calculated from personal mean and median of 1-min readings over 6-hour periods

| PM2.5 ( $\mu\text{g}/\text{m}^3$ ) |         |                            | mean | SD  | min | median | max  |
|------------------------------------|---------|----------------------------|------|-----|-----|--------|------|
| welding                            | overall | personal shift average     | 421  | 360 | 32  | 358    | 2278 |
|                                    |         | personal shift median      | 185  | 180 | 9   | 114    | 1169 |
|                                    | summer  | personal shift average     | 296  | 213 | 32  | 266    | 1404 |
|                                    |         | personal shift median      | 106  | 104 | 9   | 70     | 496  |
|                                    | winter  | personal shift average     | 612  | 368 | 99  | 560    | 2279 |
|                                    |         | personal shift median      | 303  | 203 | 24  | 295    | 1169 |
| classroom                          | overall | personal classroom average | 120  | 60  | 1   | 69     | 570  |
|                                    |         | personal classroom median  | 69   | 107 | 1   | 18     | 408  |
|                                    | summer  | personal classroom average | 90   | 103 | 4   | 58     | 427  |
|                                    |         | personal classroom median  | 39   | 54  | 3   | 18     | 340  |
|                                    | winter  | personal classroom average | 175  | 191 | 1   | 82     | 569  |
|                                    |         | personal classroom median  | 123  | 143 | 1   | 25     | 408  |

**Supplementary Table 2.** Top hits of two-factor factorial ANOVA analysis of day (welding/office area) and time (morning/afternoon)

|                         | F <sub>W/N</sub> | Adj.p <sub>W/N</sub> | F <sub>AM/PM</sub> | Adj.p <sub>AM/PM</sub> | F <sub>interaction</sub> | Adj.p <sub>interaction</sub> |
|-------------------------|------------------|----------------------|--------------------|------------------------|--------------------------|------------------------------|
| Sphingosine 1-phosphate | 16.35            | 0.09                 | 24.58              | <0.01                  | 17.27                    | 0.03                         |
| 1-myristoylglycerol 140 | 6.52             | 1.00                 | 19.05              | <0.01                  | 1.04                     | 0.82                         |
| 4-allylphenol sulfate   | 5.43             | 1.00                 | 29.86              | <0.01                  | 4.82                     | 0.40                         |
| Oleoyl ethanolamide     | 5.36             | 1.00                 | 23.19              | <0.01                  | 0.74                     | 0.84                         |
| Sphinganine-1-phosphate | 5.36             | 1.00                 | 0.58               | 0.56                   | 23.94                    | <0.01                        |
| Sphingosine             | 5.20             | 1.00                 | 13.65              | <0.01                  | 2.88                     | 0.57                         |
| Arginine                | 4.67             | 1.00                 | 48.84              | <0.01                  | 2.60                     | 0.57                         |
| Citraconate/glutaconate | 4.56             | 1.00                 | 7.78               | 0.02                   | 0.13                     | 0.93                         |
| Prolylglycine           | 4.12             | 1.00                 | 130.92             | <0.01                  | 0.90                     | 0.84                         |
| Oleoylcarnitine C181    | 4.11             | 1.00                 | 37.35              | <0.01                  | 4.95                     | 0.38                         |

*P*-values were adjusted for multiple comparisons using the false discovery rate method.

F<sub>w/n</sub>: F value for welding to nonwelding comparison. Adj.p<sub>w/n</sub>: Adjusted *p*-value for welding to nonwelding comparison. F<sub>AM/PM</sub>: F value for morning to afternoon comparison. Adj.p<sub>AM/PM</sub>: Adjusted *p*-value for morning to afternoon comparison.

**Supplementary Table 3.** Profile of sphingosine-1-phosphate, sphinganine 1-phosphate, and sphingosine over time in a crossover setting (corresponding to Figure 2)

|                         | Classroom – welding (N=36) |                          |                 |              | Welding – classroom (N=8) |              |                                 |              |       |
|-------------------------|----------------------------|--------------------------|-----------------|--------------|---------------------------|--------------|---------------------------------|--------------|-------|
|                         | Classroom (Day 1)          |                          | Welding (Day 2) |              | Welding (Day 1)           |              | Classroom (Day 7 <sup>a</sup> ) |              |       |
|                         | Mean (SD)                  | Median                   | Mean (SD)       | Median       | Mean (SD)                 | Median       | Mean (SD)                       | Median       |       |
| Sphingosine 1-phosphate | AM                         | 0.26 (0.33) <sup>b</sup> | 0.34            | -0.15 (0.27) | -0.17                     | -0.2 (0.26)  | -0.19                           | 0.24 (0.33)  | 0.29  |
|                         | PM                         | 0 (0.34)                 | 0.04            | -0.15 (0.36) | -0.18                     | -0.21 (0.27) | -0.22                           | -0.2 (0.24)  | -0.17 |
| Sphinganine 1-phosphate | AM                         | 0.19 (0.43)              | 0.29            | -0.29 (0.45) | -0.26                     | -0.16 (0.36) | -0.06                           | 0.13 (0.44)  | 0.23  |
|                         | PM                         | -0.1 (0.52)              | 0.05            | -0.04 (0.55) | -0.14                     | -0.11 (0.41) | -0.10                           | -0.31 (0.33) | -0.32 |
| Sphingosine             | AM                         | 0.32 (0.61)              | 0.35            | -0.17 (0.43) | -0.08                     | -0.55 (0.69) | -0.37                           | 0.07 (0.66)  | 0.15  |
|                         | PM                         | -0.06 (0.44)             | -0.05           | -0.23 (0.66) | -0.19                     | -0.5 (0.62)  | -0.51                           | -0.38 (0.66) | -0.28 |

<sup>a</sup> Based on approximate time interval.

<sup>b</sup> Interaction effects of all metabolites in the two-factor factorial design were significant ( $p < 0.05$ ), except for sphingosine in the classroom-welding group. The lack of significance here was possibly due to an outlier, and the interaction term was significant after removing the outlier sample.

## Supplementary Material – Principal Component Analysis

**Supplementary Figure 1.** PCA plots colored by instrumental batches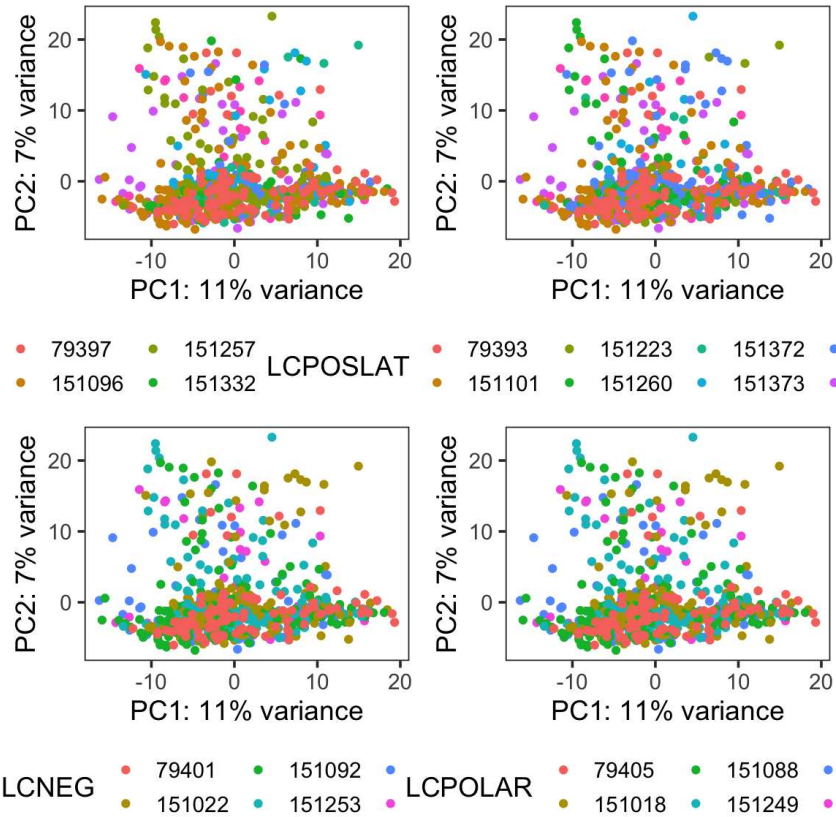

Platforms used to quantify metabolites: LCPOSLAT: LC/MS Pos Late, LCNEG: LC/MS Neg, LCPOLAR: LC/MS Polar.

Instrumental batch was defined as batches run by different platforms in different dates (e.g. 79397, 131257, 151096, and 151332 represent four batches that were run on LCPOSLAT platform).

**Supplementary Figure 2.** PCA plot colored by smoking status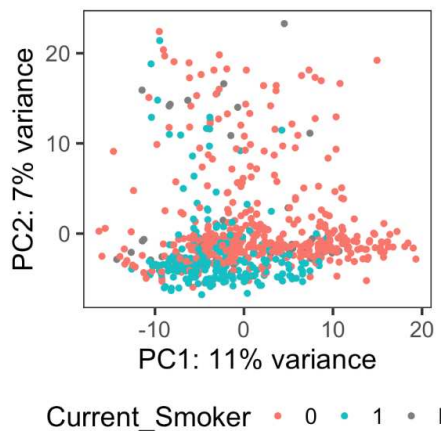

The grey dots indicate 'unknown' smoking status.

**Supplementary Figure 3.** The metabolic pathway of S1P and SA1P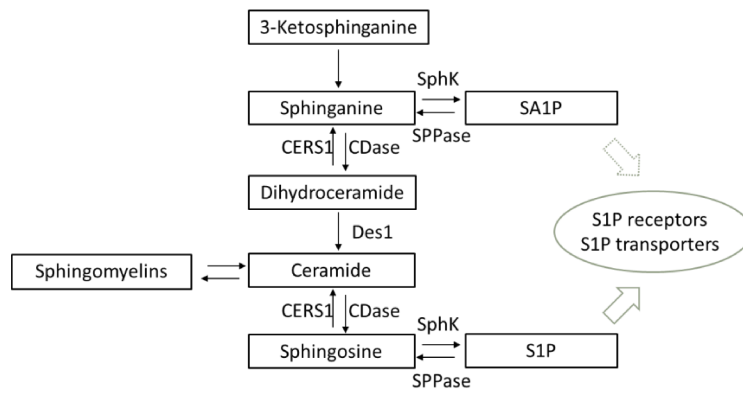

CDase: ceramidase

CERS1: ceramide synthase 1

Des1: dihydroceramide desaturase 1

S1P: sphingosine 1-phosphate

SA1P: sphinganine 1-phosphate

SphK: sphingosine kinase

SPPase: sphingosine-1-phosphate phosphatases

**Supplementary Figure 4.** Profiles of sphingosine 1-phosphate, sphinganine 1-phosphate, and sphingosine over time, by smoking status

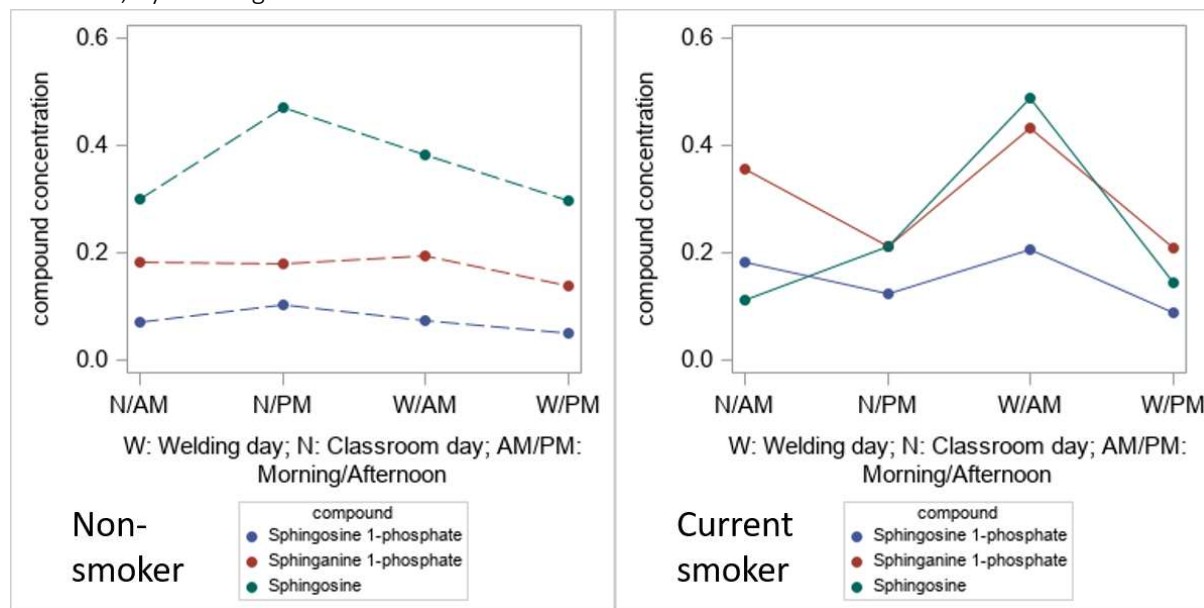

The left plot shows the average levels of the indicated compounds on welding day and non-welding day of non-smokers (29 participants). The right plot shows the average levels of the indicated compounds on the welding day and non-welding day of current smokers (15 participants).

**Supplementary Figure 5.** Profiles of sphingosine 1-phosphate, sphinganine 1-phosphate, and sphingosine over time, by normal weight/overweight participants

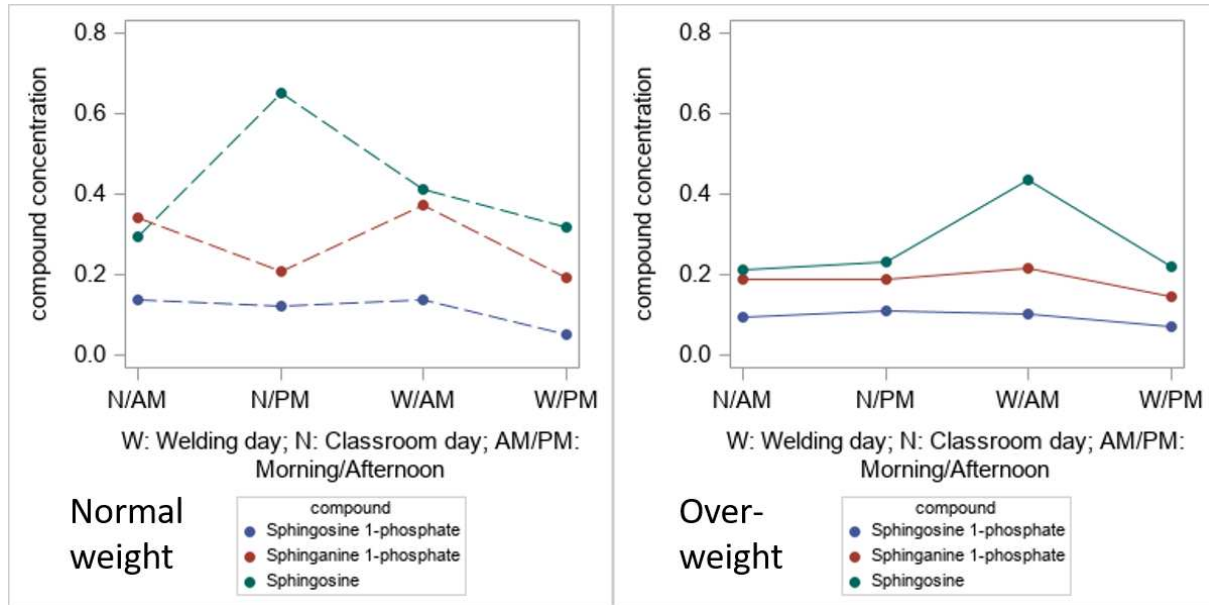

The left plot shows the average levels of the indicated compounds on welding day and non-welding day of normal weight participants (16 participants). The right plot shows the average levels of the indicated compounds on the welding day and non-welding day of overweight participants (28 participants).



**Supplementary Figure 6.** Profile of sphingosine 1-phosphate, sphinganine 1-phosphate, and sphingosine over time (five or six samples within about two weeks). The approximate day numbers show the average interval

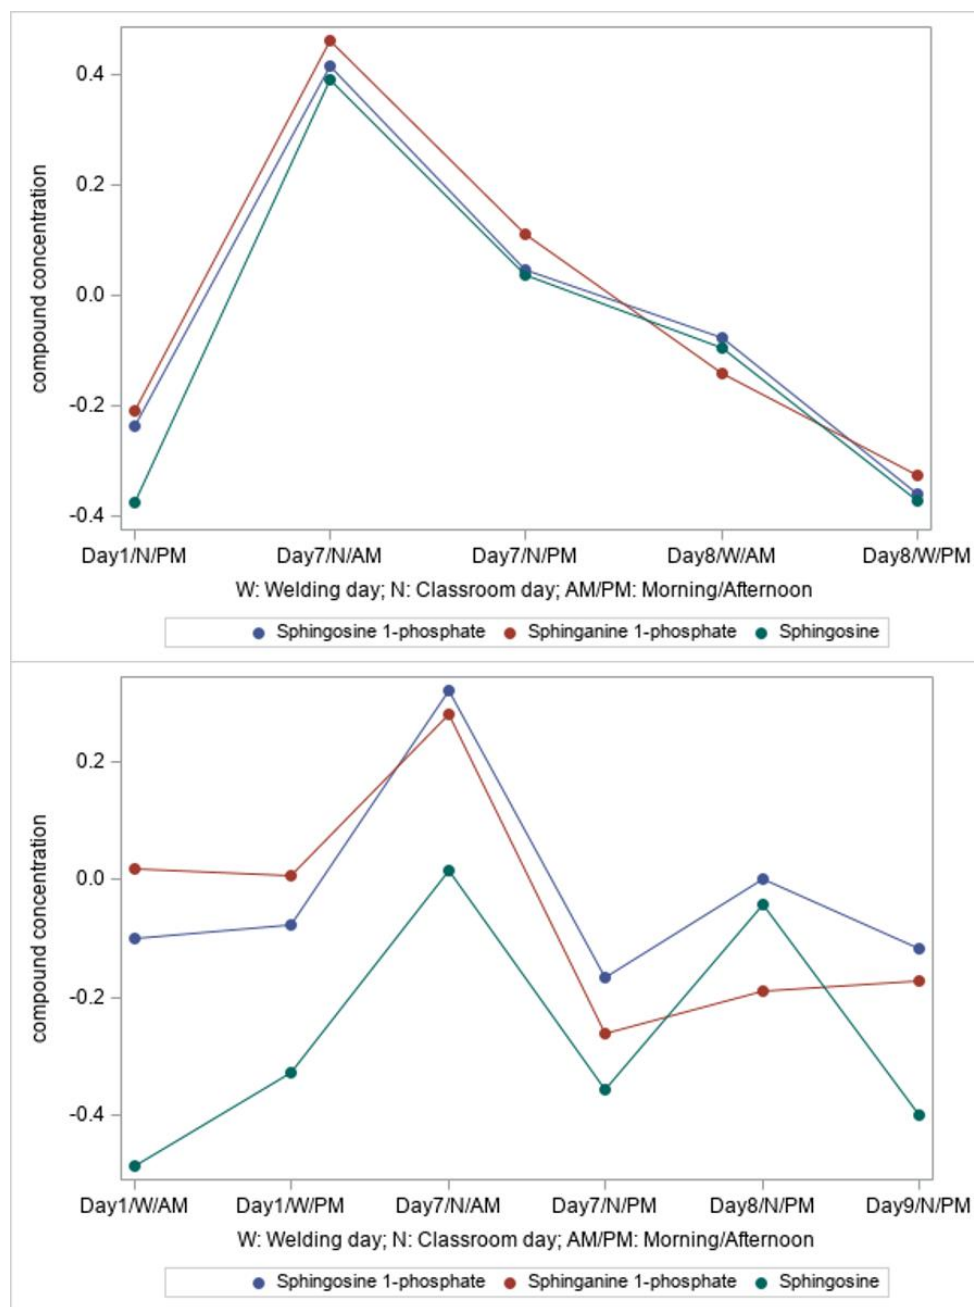

between days of measurements.

The two plots show the profile of sphingosine 1-phosphate, sphinganine 1-phosphate, and sphingosine in two study settings. Each trajectory stands for one metabolite. In the upper plot, welding day was after the classroom day; in the lower plot, welding day was before the classroom day.
